# Supplementary material for: Associations of genetic and infectious risk factors with coronary heart disease
Source: eLife. 2023 Feb 14;12:e79742. doi: 10.7554/eLife.79742 (PMC9928420; doi:10.7554/eLife.79742)
Supplement: Figure 1—source data 1. [file elife-79742-fig1-data1.xlsx]

## Sheet: Fig_1_prevalence
Panel_pathogen	Group	x	y	ymin	ymax	Fill
1	1	1	100	4.07	100	#EFA86E
1	2	1	4.07	0	4.07	#DB735C
1	3	2	100	3.29	100	#EFA86E
1	4	2	3.29	0	3.29	#DB735C
2	1	1	100	4.07	100	#EFA86E
2	2	1	4.07	0	4.07	#DB735C
2	3	2	100	4.11	100	#EFA86E
2	4	2	4.11	0	4.11	#DB735C
3	1	1	100	14.52	100	#EFA86E
3	2	1	14.52	0	14.52	#DB735C
3	3	2	100	22.74	100	#EFA86E
3	4	2	22.74	0	22.74	#DB735C
4	1	1	100	17.38	100	#EFA86E
4	2	1	17.38	0	17.38	#DB735C
4	3	2	100	20.55	100	#EFA86E
4	4	2	20.55	0	20.55	#DB735C
5	1	1	100	19.76	100	#EFA86E
5	2	1	19.76	0	19.76	#DB735C
5	3	2	100	19.45	100	#EFA86E
5	4	2	19.45	0	19.45	#DB735C
6	1	1	100	24.47	100	#EFA86E
6	2	1	24.47	0	24.47	#DB735C
6	3	2	100	32.33	100	#EFA86E
6	4	2	32.33	0	32.33	#DB735C
7	1	1	100	34.62	100	#EFA86E
7	2	1	34.62	0	34.62	#DB735C
7	3	2	100	41.64	100	#EFA86E
7	4	2	41.64	0	41.64	#DB735C
8	1	1	100	39.83	100	#EFA86E
8	2	1	39.83	0	39.83	#DB735C
8	3	2	100	37.53	100	#EFA86E
8	4	2	37.53	0	37.53	#DB735C
9	1	1	100	51.1	100	#EFA86E
9	2	1	51.1	0	51.1	#DB735C
9	3	2	100	41.1	100	#EFA86E
9	4	2	41.1	0	41.1	#DB735C
10	1	1	100	41.58	100	#EFA86E
10	2	1	41.58	0	41.58	#DB735C
10	3	2	100	45.48	100	#EFA86E
10	4	2	45.48	0	45.48	#DB735C
11	1	1	100	53.66	100	#EFA86E
11	2	1	53.66	0	53.66	#DB735C
11	3	2	100	49.04	100	#EFA86E
11	4	2	49.04	0	49.04	#DB735C
12	1	1	100	52	100	#EFA86E
12	2	1	52	0	52	#DB735C
12	3	2	100	52.6	100	#EFA86E
12	4	2	52.6	0	52.6	#DB735C
13	1	1	100	54.29	100	#EFA86E
13	2	1	54.29	0	54.29	#DB735C
13	3	2	100	53.7	100	#EFA86E
13	4	2	53.7	0	53.7	#DB735C
14	1	1	100	70.05	100	#EFA86E
14	2	1	70.05	0	70.05	#DB735C
14	3	2	100	66.58	100	#EFA86E
14	4	2	66.58	0	66.58	#DB735C
15	1	1	100	77.82	100	#EFA86E
15	2	1	77.82	0	77.82	#DB735C
15	3	2	100	67.95	100	#EFA86E
15	4	2	67.95	0	67.95	#DB735C
16	1	1	100	71.5	100	#EFA86E
16	2	1	71.5	0	71.5	#DB735C
16	3	2	100	71.78	100	#EFA86E
16	4	2	71.78	0	71.78	#DB735C
17	1	1	100	72.97	100	#EFA86E
17	2	1	72.97	0	72.97	#DB735C
17	3	2	100	80.82	100	#EFA86E
17	4	2	80.82	0	80.82	#DB735C
18	1	1	100	84.33	100	#EFA86E
18	2	1	84.33	0	84.33	#DB735C
18	3	2	100	84.66	100	#EFA86E
18	4	2	84.66	0	84.66	#DB735C
19	1	1	100	84.84	100	#EFA86E
19	2	1	84.84	0	84.84	#DB735C
19	3	2	100	90.41	100	#EFA86E
19	4	2	90.41	0	90.41	#DB735C
20	1	1	100	87.8	100	#EFA86E
20	2	1	87.8	0	87.8	#DB735C
20	3	2	100	91.23	100	#EFA86E
20	4	2	91.23	0	91.23	#DB735C
21	1	1	100	95.6	100	#EFA86E
21	2	1	95.6	0	95.6	#DB735C
21	3	2	100	96.99	100	#EFA86E
21	4	2	96.99	0	96.99	#DB735C
22	1	1	100	96.81	100	#EFA86E
22	2	1	96.81	0	96.81	#DB735C
22	3	2	100	96.71	100	#EFA86E
22	4	2	96.71	0	96.71	#DB735C
