# Supplementary material for: Associations of genetic and infectious risk factors with coronary heart disease
Source: eLife. 2023 Feb 14;12:e79742. doi: 10.7554/eLife.79742 (PMC9928420; doi:10.7554/eLife.79742)
Supplement: Figure 2—source data 1. [file elife-79742-fig2-data1.xlsx]

## Sheet: Fig_2_HR
Variable	Hazard ratio	xmin	xmax
SCORE2	1.96	1.74	2.22
Statin_title	NA	NA	NA
Statin_0	0	0	0
Statin_1	2.24	1.5	3.35
CHD-PRS	1.31	1.1	1.56
F_nucleatum_title	NA	NA	NA
F_nucleatum_0	0	0	0
F_nucleatum_1	1.63	1.08	2.45
C_trachomatis_title	NA	NA	NA
C_trachomatis_0	0	0	0
C_trachomatis_1	1.38	0.98	1.94
HPyV6_title	NA	NA	NA
HPyV6_0	0	0	0
HPyV6_1	1.57	0.9	2.73
HSV_1_title	NA	NA	NA
HSV_1_0	0	0	0
HSV_1_1	1.37	0.9	2.09
